# Supplementary material for: Circ_0030235 knockdown protects H9c2 cells against OGD/R-induced injury via regulation of miR-526b
Source: PeerJ. 2021 Nov 16;9:e11482. doi: 10.7717/peerj.11482 (PMC8603820; doi:10.7717/peerj.11482)
Supplement: Supplemental Information 2 [file peerj-09-11482-s002.xlsx]

## Sheet: figure 1
Control	OGD/R
0.99	1.88
1.11	1.95
1.03	1.82
1	1.84
1.07	1.78
0.91	1.73
0.96	1.97
0.86	1.69
1.03	1.9
Repeat	Sample Name	Target Name	CT	mean	Target Name	CT	mean	△CT	△△CT	2^(-△△CT)	2 decimal
normalization	nor-1	circ_0030235	27.4808	26.0611	GAPDH	19.8944	18.8817	7.1794	0	1	1
	nor-2	circ_0030235	26.5819		GAPDH	18.7333
	nor-3	circ_0030235	24.1205		GAPDH	18.0175
1	control-1	circ_0030235	26.524	27.178	GAPDH	19.3264	19.9856	7.1924	0.013	0.991	0.99
	control-2	circ_0030235	28.1121		GAPDH	20.9942
	control-3	circ_0030235	26.8979		GAPDH	19.6363
2	control-1	circ_0030235	25.1358	26.373	GAPDH	18.173	19.3413	7.0317	-0.1477	1.1078	1.11
	control-2	circ_0030235	26.8641		GAPDH	19.8333
	control-3	circ_0030235	27.1191		GAPDH	20.0177
3	control-1	circ_0030235	25.885	25.5566	GAPDH	18.7081	18.4222	7.1344	-0.045	1.0317	1.03
	control-2	circ_0030235	25.3335		GAPDH	18.2605
	control-3	circ_0030235	25.4513		GAPDH	18.2981
4	control-1	circ_0030235	25.9915	26.4452	GAPDH	18.9006	19.2668	7.1784	-0.001	1.0007	1
	control-2	circ_0030235	27.5371		GAPDH	20.4616
	control-3	circ_0030235	25.807		GAPDH	18.4383
5	control-1	circ_0030235	27.6394	26.565	GAPDH	20.4588	19.4764	7.0887	-0.0907	1.0649	1.06
	control-2	circ_0030235	25.5519		GAPDH	18.5095
	control-3	circ_0030235	26.5038		GAPDH	19.4608
6	control-1	circ_0030235	26.2243	25.7331	GAPDH	18.9034	18.4212	7.3119	0.1325	0.9122	0.91
	control-2	circ_0030235	25.6247		GAPDH	18.32
	control-3	circ_0030235	25.3503		GAPDH	18.0403
7	control-1	circ_0030235	28.0338	27.1592	GAPDH	20.8034	19.9198	7.2394	0.06	0.9592	0.96
	control-2	circ_0030235	26.1286		GAPDH	18.9087
	control-3	circ_0030235	27.3151		GAPDH	20.0473
8	control-1	circ_0030235	25.8355	26.1132	GAPDH	18.3204	18.7128	7.4005	0.2211	0.8579	0.86
	control-2	circ_0030235	26.7851		GAPDH	19.4447
	control-3	circ_0030235	25.7192		GAPDH	18.3732
9	control-1	circ_0030235	28.0041	27.1393	GAPDH	20.7773	20.0016	7.1377	-0.0417	1.0293	1.03
	control-2	circ_0030235	27.2377		GAPDH	20.1403
	control-3	circ_0030235	26.1762		GAPDH	19.0873
1	OGD/R-1	circ_0030235	24.4717	25.1026	GAPDH	18.1823	18.8311	6.2715	-0.9079	1.8763	1.88
	OGD/R-2	circ_0030235	26.387		GAPDH	20.135
	OGD/R-3	circ_0030235	24.449		GAPDH	18.176
2	OGD/R-1	circ_0030235	26.24	25.6513	GAPDH	20.037	19.4327	6.2186	-0.9608	1.9464	1.95
	OGD/R-2	circ_0030235	25.5979		GAPDH	19.4069
	OGD/R-3	circ_0030235	25.116		GAPDH	18.8542
3	OGD/R-1	circ_0030235	24.6841	24.8099	GAPDH	18.3641	18.4933	6.3166	-0.8627	1.8185	1.82
	OGD/R-2	circ_0030235	25.0745		GAPDH	18.7492
	OGD/R-3	circ_0030235	24.6711		GAPDH	18.3666
4	OGD/R-1	circ_0030235	26.5599	26.5751	GAPDH	20.2863	20.2725	6.3026	-0.8768	1.8363	1.84
	OGD/R-2	circ_0030235	27.1567		GAPDH	20.8949
	OGD/R-3	circ_0030235	26.0086		GAPDH	19.6363
5	OGD/R-1	circ_0030235	24.6852	26.2967	GAPDH	18.2623	19.9503	6.3465	-0.8329	1.7813	1.78
	OGD/R-2	circ_0030235	27.2606		GAPDH	20.9808
	OGD/R-3	circ_0030235	26.9444		GAPDH	20.6078
6	OGD/R-1	circ_0030235	25.0502	25.6117	GAPDH	18.7004	19.2217	6.39	-0.7894	1.7283	1.73
	OGD/R-2	circ_0030235	25.8675		GAPDH	19.4752
	OGD/R-3	circ_0030235	25.9173		GAPDH	19.4895
7	OGD/R-1	circ_0030235	26.0368	24.8432	GAPDH	19.8536	18.6405	6.2027	-0.9766	1.9678	1.97
	OGD/R-2	circ_0030235	24.2494		GAPDH	18.0336
	OGD/R-3	circ_0030235	24.2433		GAPDH	18.0341
8	OGD/R-1	circ_0030235	24.7537	25.2819	GAPDH	18.3397	18.8612	6.4207	-0.7586	1.6919	1.69
	OGD/R-2	circ_0030235	24.6285		GAPDH	18.2196
	OGD/R-3	circ_0030235	26.4634		GAPDH	20.0242
9	OGD/R-1	circ_0030235	27.1741	26.4206	GAPDH	20.9228	20.1638	6.2567	-0.9226	1.8956	1.9
	OGD/R-2	circ_0030235	26.8763		GAPDH	20.625
	OGD/R-3	circ_0030235	25.2112		GAPDH	18.9438

## Sheet: figure 2
2a
Control	sh-NC	sh-circ
1.1	1.18	0.47
0.94	0.97	0.49
0.9	1.06	0.4
1.02	0.79	0.41
1.11	1.19	0.48
1.02	0.86	0.43
0.94	1.08	0.43
1.09	0.93	0.48
1.01	0.87	0.38
Repeat	Sample Name	Target Name	CT	mean	Target Name	CT	mean	△CT	△△CT	2^(-△△CT)	2 decimal
normalization	nor-1	circ_0030235	27.3476	24.654	GAPDH	18.6686	18.8437	5.8104	0	1	1
	nor-2	circ_0030235	22.8137		GAPDH	19.5971
	nor-3	circ_0030235	23.8008		GAPDH	18.2654
1	control-1	circ_0030235	25.1931	25.1312	GAPDH	19.5503	19.4665	5.6647	-0.1456	1.1062	1.11
	control-2	circ_0030235	23.9407		GAPDH	18.2857
	control-3	circ_0030235	26.2598		GAPDH	20.5636
2	control-1	circ_0030235	26.8153	25.2321	GAPDH	20.932	19.3255	5.9066	0.0963	0.9354	0.94
	control-2	circ_0030235	24.6987		GAPDH	18.7755
	control-3	circ_0030235	24.1824		GAPDH	18.2689
3	control-1	circ_0030235	24.1511	24.5996	GAPDH	18.0694	18.631	5.9685	0.1582	0.8962	0.9
	control-2	circ_0030235	25.3635		GAPDH	19.3948
	control-3	circ_0030235	24.2841		GAPDH	18.4289
4	control-1	circ_0030235	25.6432	24.8123	GAPDH	19.7371	19.0301	5.7822	-0.0282	1.0197	1.02
	control-2	circ_0030235	24.8281		GAPDH	19.025
	control-3	circ_0030235	23.9655		GAPDH	18.3281
5	control-1	circ_0030235	25.8515	25.575	GAPDH	20.226	19.911	5.664	-0.1464	1.1068	1.11
	control-2	circ_0030235	26.4272		GAPDH	20.7448
	control-3	circ_0030235	24.4463		GAPDH	18.7622
6	control-1	circ_0030235	24.4063	25.5577	GAPDH	18.7446	19.7741	5.7836	-0.0268	1.0187	1.02
	control-2	circ_0030235	26.2648		GAPDH	20.4688
	control-3	circ_0030235	26.0019		GAPDH	20.1089
7	control-1	circ_0030235	25.0271	25.4712	GAPDH	19.0453	19.5727	5.8986	0.0882	0.9407	0.94
	control-2	circ_0030235	25.9019		GAPDH	20.0731
	control-3	circ_0030235	25.4848		GAPDH	19.5996
8	control-1	circ_0030235	26.4421	25.3423	GAPDH	20.7254	19.653	5.6894	-0.121	1.0875	1.09
	control-2	circ_0030235	25.1793		GAPDH	19.3959
	control-3	circ_0030235	24.4057		GAPDH	18.8376
9	control-1	circ_0030235	25.9532	25.0876	GAPDH	20.0331	19.2852	5.8024	-0.008	1.0055	1.01
	control-2	circ_0030235	24.208		GAPDH	18.2595
	control-3	circ_0030235	25.1015		GAPDH	19.5629
1	sh-NC-1	circ_0030235	24.5607	24.5241	GAPDH	18.9507	18.9509	5.5731	-0.2372	1.1787	1.18
	sh-NC-2	circ_0030235	23.5193		GAPDH	18.0428
	sh-NC-3	circ_0030235	25.4922		GAPDH	19.8594
2	sh-NC-1	circ_0030235	24.7003	24.5907	GAPDH	18.8489	18.7391	5.8516	0.0412	0.9718	0.97
	sh-NC-2	circ_0030235	23.9231		GAPDH	18.0588
	sh-NC-3	circ_0030235	25.1487		GAPDH	19.3096
3	sh-NC-1	circ_0030235	26.2019	25.0004	GAPDH	20.4456	19.2751	5.7252	-0.0851	1.0608	1.06
	sh-NC-2	circ_0030235	24.9315		GAPDH	19.2458
	sh-NC-3	circ_0030235	23.8678		GAPDH	18.134
4	sh-NC-1	circ_0030235	26.104	25.7815	GAPDH	19.7562	19.6229	6.1586	0.3483	0.7855	0.79
	sh-NC-2	circ_0030235	24.695		GAPDH	18.6338
	sh-NC-3	circ_0030235	26.5455		GAPDH	20.4786
5	sh-NC-1	circ_0030235	26.0667	25.8959	GAPDH	20.5169	20.3372	5.5587	-0.2517	1.1906	1.19
	sh-NC-2	circ_0030235	25.3585		GAPDH	19.8881
	sh-NC-3	circ_0030235	26.2625		GAPDH	20.6067
6	sh-NC-1	circ_0030235	24.0715	24.3823	GAPDH	18.0311	18.354	6.0284	0.218	0.8598	0.86
	sh-NC-2	circ_0030235	24.2974		GAPDH	18.2787
	sh-NC-3	circ_0030235	24.778		GAPDH	18.7521
7	sh-NC-1	circ_0030235	24.3843	25.3682	GAPDH	18.6514	19.6697	5.6985	-0.1119	1.0806	1.08
	sh-NC-2	circ_0030235	25.8036		GAPDH	20.1244
	sh-NC-3	circ_0030235	25.9166		GAPDH	20.2333
8	sh-NC-1	circ_0030235	26.4592	25.7142	GAPDH	20.6212	19.7978	5.9164	0.106	0.9291	0.93
	sh-NC-2	circ_0030235	25.3995		GAPDH	19.5244
	sh-NC-3	circ_0030235	25.2839		GAPDH	19.2478
9	sh-NC-1	circ_0030235	25.1469	26.1553	GAPDH	19.1559	20.1425	6.0129	0.2025	0.869	0.87
	sh-NC-2	circ_0030235	26.9146		GAPDH	20.945
	sh-NC-3	circ_0030235	26.4044		GAPDH	20.3265
1	sh-circ-1	circ_0030235	27.8244	27.2046	GAPDH	20.5878	20.2907	6.9139	1.1036	0.4654	0.47
	sh-circ-2	circ_0030235	26.1655		GAPDH	19.3634
	sh-circ-3	circ_0030235	27.624		GAPDH	20.9209
2	sh-circ-1	circ_0030235	26.0682	25.7344	GAPDH	19.1679	18.882	6.8524	1.042	0.4856	0.49
	sh-circ-2	circ_0030235	26.2106		GAPDH	19.4682
	sh-circ-3	circ_0030235	24.9244		GAPDH	18.01
3	sh-circ-1	circ_0030235	25.5069	25.5262	GAPDH	18.121	18.3792	7.147	1.3367	0.3959	0.4
	sh-circ-2	circ_0030235	25.4168		GAPDH	18.1642
	sh-circ-3	circ_0030235	25.6549		GAPDH	18.8524
4	sh-circ-1	circ_0030235	25.7596	26.1318	GAPDH	18.5759	19.0319	7.0999	1.2895	0.4091	0.41
	sh-circ-2	circ_0030235	27.1052		GAPDH	20.0705
	sh-circ-3	circ_0030235	25.5305		GAPDH	18.4492
5	sh-circ-1	circ_0030235	25.6833	25.763	GAPDH	18.9908	18.901	6.862	1.0517	0.4824	0.48
	sh-circ-2	circ_0030235	25.1431		GAPDH	18.5791
	sh-circ-3	circ_0030235	26.4625		GAPDH	19.1331
6	sh-circ-1	circ_0030235	28.0142	27.557	GAPDH	20.944	20.5179	7.0392	1.2288	0.4267	0.43
	sh-circ-2	circ_0030235	27.0388		GAPDH	19.9509
	sh-circ-3	circ_0030235	27.6181		GAPDH	20.6586
7	sh-circ-1	circ_0030235	25.0605	26.7601	GAPDH	18.117	19.7292	7.031	1.2206	0.4291	0.43
	sh-circ-2	circ_0030235	28.0634		GAPDH	20.9019
	sh-circ-3	circ_0030235	27.1565		GAPDH	20.1686
8	sh-circ-1	circ_0030235	25.3102	26.1	GAPDH	18.5692	19.2348	6.8652	1.0548	0.4814	0.48
	sh-circ-2	circ_0030235	26.5218		GAPDH	19.5817
	sh-circ-3	circ_0030235	26.4681		GAPDH	19.5537
9	sh-circ-1	circ_0030235	26.9007	26.4981	GAPDH	19.4771	19.2756	7.2225	1.4122	0.3757	0.38
	sh-circ-2	circ_0030235	25.8223		GAPDH	18.4854
	sh-circ-3	circ_0030235	26.7712		GAPDH	19.8642
2b
Control	OGD/R	OGD/R+sh-NC	OGD/R+sh-circ
108.84	51.14	50.69	70.64
105.59	54.17	48.8	83.45
88.66	45.49	57.1	84.13
89.55	52.62	53.84	76.33
92.53	49.81	49.82	78.79
87.77	48.57	57.01	81.94
112.6	51.48	52.04	85.45
103.13	51.39	51.72	80.17
107.07	48.73	49.61	65.73
Repeat	OD blank	Mean OD blank	OD negative	Mean OD negative
1	0.0002847	0.0002157	0.465654	0.490902
	0.0002611		0.47244
	0.0001013		0.534613
2	0.000149	0.000148967	0.520269	0.492646
	0.0002119		0.479306
	8.6e-05		0.478364
3	9.16e-05	0.000169467	0.519154	0.508855
	0.000144		0.501262
	0.0002728		0.50615
Repeat	Sample Name	OD	Mean OD	Cell viability (%)
1	Control-1	0.509191	0.534298	108.84
	Control-2	0.601285
	Control-3	0.492417
1	OGD/R-1	0.145975	0.251168	51.14
	OGD/R-2	0.229229
	OGD/R-3	0.3783
1	OGD/R+sh-NC-1	0.394165	0.248938	50.69
	OGD/R+sh-NC-2	0.175551
	OGD/R+sh-NC-3	0.177098
1	OGD/R+sh-circ-1	0.397126	0.346841	70.64
	OGD/R+sh-circ-2	0.402756
	OGD/R+sh-circ-3	0.240641
2	Control-1	0.42411	0.520179	105.59
	Control-2	0.66456
	Control-3	0.471868
2	OGD/R-1	0.128406	0.266958	54.17
	OGD/R-2	0.444718
	OGD/R-3	0.22775
2	OGD/R+sh-NC-1	0.201886	0.240467	48.8
	OGD/R+sh-NC-2	0.245966
	OGD/R+sh-NC-3	0.273549
2	OGD/R+sh-circ-1	0.278143	0.411124	83.45
	OGD/R+sh-circ-2	0.427141
	OGD/R+sh-circ-3	0.528089
3	Control-1	0.570722	0.451174	88.66
	Control-2	0.447485
	Control-3	0.335315
3	OGD/R-1	0.260941	0.231585	45.49
	OGD/R-2	0.315227
	OGD/R-3	0.118586
3	OGD/R+sh-NC-1	0.330667	0.290639	57.1
	OGD/R+sh-NC-2	0.365484
	OGD/R+sh-NC-3	0.175767
3	OGD/R+sh-circ-1	0.333084	0.428145	84.13
	OGD/R+sh-circ-2	0.458897
	OGD/R+sh-circ-3	0.492455
Repeat	OD blank	Mean OD blank	OD negative	Mean OD negative
4	0.0002106	0.000237533	0.467364	0.468525
	0.0002636		0.465843
	0.0002384		0.472368
5	0.0002156	0.000169433	0.525105	0.507892
	7.05e-05		0.54469
	0.0002222		0.453881
6	0.0001535	0.000156467	0.518015	0.502454
	9.36e-05		0.511678
	0.0002223		0.477668
Repeat	Sample Name	OD	Mean OD	Cell viability (%)
4	Control-1	0.527459	0.419611	89.55
	Control-2	0.358916
	Control-3	0.372459
4	OGD/R-1	0.217176	0.246663	52.62
	OGD/R-2	0.124737
	OGD/R-3	0.398075
4	OGD/R+sh-NC-1	0.110685	0.252383	53.84
	OGD/R+sh-NC-2	0.320203
	OGD/R+sh-NC-3	0.32626
4	OGD/R+sh-circ-1	0.494851	0.357678	76.33
	OGD/R+sh-circ-2	0.269991
	OGD/R+sh-circ-3	0.308192
5	Control-1	0.617901	0.469974	92.53
	Control-2	0.512417
	Control-3	0.279603
5	OGD/R-1	0.249679	0.253069	49.81
	OGD/R-2	0.286148
	OGD/R-3	0.223379
5	OGD/R+sh-NC-1	0.350588	0.253131	49.82
	OGD/R+sh-NC-2	0.201486
	OGD/R+sh-NC-3	0.20732
5	OGD/R+sh-circ-1	0.389663	0.400227	78.79
	OGD/R+sh-circ-2	0.422654
	OGD/R+sh-circ-3	0.388365
6	Control-1	0.360197	0.441032	87.77
	Control-2	0.616404
	Control-3	0.346496
6	OGD/R-1	0.130396	0.244144	48.57
	OGD/R-2	0.413676
	OGD/R-3	0.18836
6	OGD/R+sh-NC-1	0.190249	0.286492	57.01
	OGD/R+sh-NC-2	0.293613
	OGD/R+sh-NC-3	0.375614
6	OGD/R+sh-circ-1	0.518634	0.411739	81.94
	OGD/R+sh-circ-2	0.21622
	OGD/R+sh-circ-3	0.500364
Repeat	OD blank	Mean OD blank	OD negative	Mean OD negative
7	0.0001926	0.000160733	0.466235	0.483924
	0.000154		0.526762
	0.0001356		0.458775
8	0.0002795	0.000276267	0.50951	0.477213
	0.0002649		0.45493
	0.0002844		0.467198
9	6.49e-05	0.0001368	0.534701	0.53075
	0.0002343		0.547353
	0.0001112		0.510195
Repeat	Sample Name	OD	Mean OD	Cell viability (%)
7	Control-1	0.659777	0.544892	112.6
	Control-2	0.35642
	Control-3	0.618478
7	OGD/R-1	0.278299	0.249225	51.48
	OGD/R-2	0.295716
	OGD/R-3	0.173661
7	OGD/R+sh-NC-1	0.329387	0.251909	52.04
	OGD/R+sh-NC-2	0.256438
	OGD/R+sh-NC-3	0.169902
7	OGD/R+sh-circ-1	0.493295	0.413559	85.45
	OGD/R+sh-circ-2	0.253641
	OGD/R+sh-circ-3	0.493742
8	Control-1	0.549576	0.492155	103.13
	Control-2	0.498336
	Control-3	0.428554
8	OGD/R-1	0.162367	0.245364	51.39
	OGD/R-2	0.260005
	OGD/R-3	0.31372
8	OGD/R+sh-NC-1	0.235101	0.246933	51.72
	OGD/R+sh-NC-2	0.345713
	OGD/R+sh-NC-3	0.159984
8	OGD/R+sh-circ-1	0.536981	0.382635	80.17
	OGD/R+sh-circ-2	0.347769
	OGD/R+sh-circ-3	0.263156
9	Control-1	0.591756	0.568265	107.07
	Control-2	0.707355
	Control-3	0.405683
9	OGD/R-1	0.302783	0.258693	48.73
	OGD/R-2	0.089455
	OGD/R-3	0.383841
9	OGD/R+sh-NC-1	0.52862	0.263362	49.61
	OGD/R+sh-NC-2	0.035411
	OGD/R+sh-NC-3	0.226055
9	OGD/R+sh-circ-1	0.609993	0.348887	65.73
	OGD/R+sh-circ-2	0.304058
	OGD/R+sh-circ-3	0.13261

## Sheet: figure 3
3a
Control	OGD/R	OGD/R+si-NC	OGD/R+si-circ
112.04	217.93	207.77	149.57
102.95	231.15	228.95	139.81
91.36	206.41	220.54	123.72
95.01	200.67	234.3	137
103.07	233.92	224.03	128.65
92.83	242.94	222.53	163.92
113.63	207.01	218.45	168.17
90.19	224.5	227.85	129.49
93.75	233.82	196.39	138.91
3b
Control	OGD/R	OGD/R+si-NC	OGD/R+si-circ
1.02	3.7	3.37	2.59
0.99	4.4	4.34	2.7
0.99	3.52	3.42	2.65
1.09	2.86	2.83	2.61
1.06	3.63	4.12	2.68
1.08	4.06	3.89	3.32
0.84	3.67	3.77	2.68
1.1	3.89	3.77	2.69
0.99	3.56	3.65	2.5
pg/mL	OD
15	0.048915
50	0.074894
100	0.109841
450	0.368981
500	0.59113
y = 0.001x + 0.0216
		OD	pg/mL	mean	normalization
	nor-1	0.0537287	32.1287	28.7242	1
	nor-2	0.0514534	29.8534
	nor-3	0.0457904	24.1904
	Repeat	Sample Name	OD	pg/mL	mean	fold change				Repeat	Sample Name	OD	pg/mL	mean	fold change
	1	Control-1	0.049927	28.3267	29.3029	1.02				1	OGD/R-1	0.124826	103.226	106.288	3.7
		Control-2	0.05127	29.6696							OGD/R-2	0.132216	110.616
		Control-3	0.051512	29.9123							OGD/R-3	0.126621	105.021
	2	Control-1	0.052698	31.0983	28.4187	0.99				2	OGD/R-1	0.146625	125.025	126.399	4.4
		Control-2	0.04762	26.0197							OGD/R-2	0.148701	127.101
		Control-3	0.049738	28.1381							OGD/R-3	0.148672	127.072
	3	Control-1	0.048589	26.9888	28.4003	0.99				3	OGD/R-1	0.118714	97.1141	101.128	3.52
		Control-2	0.050386	28.7865							OGD/R-2	0.124626	103.026
		Control-3	0.051026	29.4256							OGD/R-3	0.124845	103.245
	4	Control-1	0.053787	32.1873	31.3366	1.09				4	OGD/R-1	0.104717	83.117	82.1546	2.86
		Control-2	0.050876	29.2757							OGD/R-2	0.100851	79.2507
		Control-3	0.054147	32.5467							OGD/R-3	0.105696	84.0961
	5	Control-1	0.050714	29.1144	30.4469	1.06				5	OGD/R-1	0.131985	110.385	104.328	3.63
		Control-2	0.053804	32.2043							OGD/R-2	0.123696	102.096
		Control-3	0.051622	30.0219							OGD/R-3	0.122104	100.504
	6	Control-1	0.050958	29.3575	31.0292	1.08				6	OGD/R-1	0.138508	116.908	116.644	4.06
		Control-2	0.058094	36.4938							OGD/R-2	0.139549	117.949
		Control-3	0.048836	27.2362							OGD/R-3	0.136675	115.075
	7	Control-1	0.046893	25.2925	24.0628	0.84				7	OGD/R-1	0.128612	107.012	105.426	3.67
		Control-2	0.044835	23.235							OGD/R-2	0.125661	104.061
		Control-3	0.045261	23.6608							OGD/R-3	0.126806	105.206
	8	Control-1	0.05562	34.0205	31.5933	1.1				8	OGD/R-1	0.131621	110.021	111.731	3.89
		Control-2	0.05	28.4002							OGD/R-2	0.135481	113.881
		Control-3	0.053959	32.3592							OGD/R-3	0.132891	111.291
	9	Control-1	0.051054	29.454	28.4427	0.99				9	OGD/R-1	0.124595	102.995	102.268	3.56
		Control-2	0.048562	26.9615							OGD/R-2	0.121408	99.8078
		Control-3	0.050513	28.9127							OGD/R-3	0.125601	104.001
	Repeat	Sample Name	OD	pg/mL	mean	fold change				Repeat	Sample Name	OD	pg/mL	mean	fold change
	1	OGD/R+si-NC-1	0.118424	96.8236	96.7638	3.37				1	OGD/R+si-circ-1	0.097503	75.9035	74.3883	2.59
		OGD/R+si-NC-2	0.120462	98.8618							OGD/R+si-circ-2	0.092551	70.9512
		OGD/R+si-NC-3	0.116206	94.6059							OGD/R+si-circ-3	0.09791	76.3102
	2	OGD/R+si-NC-1	0.144541	122.941	124.655	4.34				2	OGD/R+si-circ-1	0.100962	79.362	77.6313	2.7
		OGD/R+si-NC-2	0.146495	124.895							OGD/R+si-circ-2	0.096551	74.9513
		OGD/R+si-NC-3	0.147729	126.129							OGD/R+si-circ-3	0.100181	78.5807
	3	OGD/R+si-NC-1	0.119818	98.2181	98.2409	3.42				3	OGD/R+si-circ-1	0.100688	79.0881	76.0502	2.65
		OGD/R+si-NC-2	0.120203	98.6033							OGD/R+si-circ-2	0.095921	74.321
		OGD/R+si-NC-3	0.119501	97.9012							OGD/R+si-circ-3	0.096342	74.7416
	4	OGD/R+si-NC-1	0.103839	82.239	81.2738	2.83				4	OGD/R+si-circ-1	0.099615	78.0151	74.9812	2.61
		OGD/R+si-NC-2	0.101635	80.0351							OGD/R+si-circ-2	0.094598	72.9981
		OGD/R+si-NC-3	0.103147	81.5473							OGD/R+si-circ-3	0.095531	73.9305
	5	OGD/R+si-NC-1	0.139104	117.504	118.312	4.12				5	OGD/R+si-circ-1	0.096596	74.9964	76.951	2.68
		OGD/R+si-NC-2	0.141941	120.341							OGD/R+si-circ-2	0.1002	78.6
		OGD/R+si-NC-3	0.13869	117.09							OGD/R+si-circ-3	0.098856	77.2565
	6	OGD/R+si-NC-1	0.128816	107.216	111.705	3.89				6	OGD/R+si-circ-1	0.121342	99.7417	95.4055	3.32
		OGD/R+si-NC-2	0.137004	115.404							OGD/R+si-circ-2	0.113819	92.2185
		OGD/R+si-NC-3	0.134096	112.496							OGD/R+si-circ-3	0.115856	94.2564
	7	OGD/R+si-NC-1	0.130795	109.195	108.269	3.77				7	OGD/R+si-circ-1	0.098192	76.5916	77.0407	2.68
		OGD/R+si-NC-2	0.128888	107.288							OGD/R+si-circ-2	0.10088	79.2798
		OGD/R+si-NC-3	0.129923	108.323							OGD/R+si-circ-3	0.096851	75.2506
	8	OGD/R+si-NC-1	0.12944	107.84	108.339	3.77				8	OGD/R+si-circ-1	0.097992	76.3918	77.2578	2.69
		OGD/R+si-NC-2	0.129889	108.289							OGD/R+si-circ-2	0.098493	76.8927
		OGD/R+si-NC-3	0.130488	108.888							OGD/R+si-circ-3	0.100089	78.489
	9	OGD/R+si-NC-1	0.123335	101.735	104.818	3.65				9	OGD/R+si-circ-1	0.092258	70.6577	71.8385	2.5
		OGD/R+si-NC-2	0.12856	106.96							OGD/R+si-circ-2	0.095544	73.9436
		OGD/R+si-NC-3	0.12736	105.76							OGD/R+si-circ-3	0.092514	70.9143
3c
Control	OGD/R	OGD/R+si-NC	OGD/R+si-circ
1.05	2.72	2.89	1.69
1	3.11	2.77	1.52
0.96	3.15	3.05	1.73
1.03	3.2	3.05	1.67
1.02	2.98	3.03	1.55
0.92	2.76	2.84	1.6
1	3.01	3.11	1.63
1.01	2.88	3.18	1.58
1.03	2.85	2.72	1.61
pg/mL	OD
30	0.05191
70	0.129165
200	0.21561
500	0.812145
1000	1.11459
y = 0.0011x + 0.0546
		OD	pg/mL	mean	normalization
	nor-1	0.42915	340.5	277.184	1
	nor-2	0.391453	306.23
	nor-3	0.257904	184.822
	Repeat	Sample Name	OD	pg/mL	mean	fold change				Repeat	Sample Name	OD	pg/mL	mean	fold change
	1	Control-1	0.3737	290.091	291.923	1.05				1	OGD/R-1	0.885126	755.024	753.595	2.72
		Control-2	0.36565	282.773							OGD/R-2	0.881378	751.616
		Control-3	0.387797	302.906							OGD/R-3	0.88416	754.146
	2	Control-1	0.361403	278.912	277.512	1				2	OGD/R-1	1.01733	875.211	862.971	3.11
		Control-2	0.361009	278.554							OGD/R-2	0.997981	857.619
		Control-3	0.357179	275.072							OGD/R-3	0.996291	856.083
	3	Control-1	0.329788	250.171	266.884	0.96				3	OGD/R-1	1.01994	877.584	873.883	3.15
		Control-2	0.340815	260.195							OGD/R-2	1.01484	872.943
		Control-3	0.373915	290.286							OGD/R-3	1.01283	871.123
	4	Control-1	0.369662	286.42	285.494	1.03				4	OGD/R-1	1.03265	889.137	886.557	3.2
		Control-2	0.364853	282.048							OGD/R-2	1.01731	875.196
		Control-3	0.371416	288.015							OGD/R-3	1.03947	895.337
	5	Control-1	0.362088	279.534	282.296	1.02				5	OGD/R-1	0.966287	828.806	826.304	2.98
		Control-2	0.370726	287.387							OGD/R-2	0.969782	831.983
		Control-3	0.362562	279.966							OGD/R-3	0.954535	818.123
	6	Control-1	0.348148	266.862	255.583	0.92				6	OGD/R-1	0.892459	761.69	765.191	2.76
		Control-2	0.329414	249.831							OGD/R-2	0.900262	768.784
		Control-3	0.329663	250.057							OGD/R-3	0.896209	765.099
	7	Control-1	0.359629	277.299	277.588	1				7	OGD/R-1	0.974845	836.586	834.101	3.01
		Control-2	0.363311	280.646							OGD/R-2	0.969155	831.414
		Control-3	0.356899	274.818							OGD/R-3	0.972334	834.304
	8	Control-1	0.364289	281.535	279.508	1.01				8	OGD/R-1	0.934108	799.552	798.925	2.88
		Control-2	0.359085	276.804							OGD/R-2	0.938191	803.264
		Control-3	0.362803	280.184							OGD/R-3	0.927954	793.958
	9	Control-1	0.373908	290.28	285.524	1.03				9	OGD/R-1	0.913321	780.656	789.171	2.85
		Control-2	0.36838	285.254							OGD/R-2	0.929838	795.671
		Control-3	0.363742	281.038							OGD/R-3	0.924904	791.185
	Repeat	Sample Name	OD	pg/mL	mean	fold change				Repeat	Sample Name	OD	pg/mL	mean	fold change
	1	OGD/R+si-NC-1	0.943111	807.737	801.159	2.89				1	OGD/R+si-circ-1	0.576596	474.542	468.151	1.69
		OGD/R+si-NC-2	0.936393	801.63							OGD/R+si-circ-2	0.568876	467.523
		OGD/R+si-NC-3	0.928123	794.112							OGD/R+si-circ-3	0.563226	462.387
	2	OGD/R+si-NC-1	0.896033	764.939	767.917	2.77				2	OGD/R+si-circ-1	0.52004	423.128	421.719	1.52
		OGD/R+si-NC-2	0.896308	765.189							OGD/R+si-circ-2	0.517553	420.867
		OGD/R+si-NC-3	0.905585	773.623							OGD/R+si-circ-3	0.517878	421.161
	3	OGD/R+si-NC-1	0.990507	850.824	845.478	3.05				3	OGD/R+si-circ-1	0.575417	473.47	479.535	1.73
		OGD/R+si-NC-2	0.982475	843.522							OGD/R+si-circ-2	0.591414	488.013
		OGD/R+si-NC-3	0.980897	842.089							OGD/R+si-circ-3	0.579435	477.123
	4	OGD/R+si-NC-1	0.979338	840.671	845.775	3.05				4	OGD/R+si-circ-1	0.560373	459.794	462.898	1.67
		OGD/R+si-NC-2	0.987921	848.473							OGD/R+si-circ-2	0.566184	465.076
		OGD/R+si-NC-3	0.9876	848.182							OGD/R+si-circ-3	0.564806	463.824
	5	OGD/R+si-NC-1	0.970164	832.331	839.346	3.03				5	OGD/R+si-circ-1	0.53681	438.373	429.113	1.55
		OGD/R+si-NC-2	0.981879	842.981							OGD/R+si-circ-2	0.526374	428.885
		OGD/R+si-NC-3	0.9816	842.727							OGD/R+si-circ-3	0.51669	420.082
	6	OGD/R+si-NC-1	0.92396	790.327	787.028	2.84				6	OGD/R+si-circ-1	0.539272	440.611	443.803	1.6
		OGD/R+si-NC-2	0.917559	784.508							OGD/R+si-circ-2	0.540253	441.503
		OGD/R+si-NC-3	0.919473	786.248							OGD/R+si-circ-3	0.548823	449.294
	7	OGD/R+si-NC-1	1.00375	862.861	862.588	3.11				7	OGD/R+si-circ-1	0.559603	459.094	451.445	1.63
		OGD/R+si-NC-2	0.997751	857.41							OGD/R+si-circ-2	0.541594	442.721
		OGD/R+si-NC-3	1.00884	867.494							OGD/R+si-circ-3	0.552371	452.519
	8	OGD/R+si-NC-1	1.02234	879.766	881.367	3.18				8	OGD/R+si-circ-1	0.537898	439.362	437.355	1.58
		OGD/R+si-NC-2	1.01983	877.48							OGD/R+si-circ-2	0.527526	429.933
		OGD/R+si-NC-3	1.03014	886.856							OGD/R+si-circ-3	0.541647	442.77
	9	OGD/R+si-NC-1	0.874998	745.816	753.424	2.72				9	OGD/R+si-circ-1	0.53848	439.891	446.179	1.61
		OGD/R+si-NC-2	0.882722	752.838							OGD/R+si-circ-2	0.556295	456.087
		OGD/R+si-NC-3	0.892378	761.617							OGD/R+si-circ-3	0.541413	442.558
3d
Control	OGD/R	OGD/R+sh-NC	OGD/R+sh-circ
7.05	56.88	48.19	29.12
8.32	57.67	55.47	26
9.29	51.6	51.71	25.78
10.01	55.17	54.43	23.25
8.56	52.99	61.97	25.04
9.35	52.7	55.95	27.11
9.12	53.41	47.42	27.14
8.85	55.62	48.66	27.87
9.82	59.13	52.19	26.71
3e
Control	OGD/R	OGD/R+sh-NC	OGD/R+sh-circ
104.14	57.06	46.74	71.72
103.85	46.05	52.14	86.4
83.71	60.23	58.3	74.34
92.1	57.92	59.03	77.78
83.55	61.04	62.41	82.46
107.03	51.46	47.75	85.8
91.42	55.2	64.53	81.28
94.09	48.97	57.23	85
100.09	53.45	51.07	68.97

## Sheet: figure 4
4a
	Control
circ-wt	1.1	0.99	1.03	0.94	1.04	1	0.96	1.02	1.05
circ-mut	0.92	0.9	0.94	1.1	1.06	1.07	0.87	0.96	0.84
	miR-NC
circ-wt	1.01	1.09	1.08	1.04	1.12	1.05	1.08	1.12	0.97
circ-mut	1.04	1.06	1.15	0.98	0.89	1.1	1.11	1.12	0.97
	miR-526b mimic
circ-wt	0.53	0.59	0.65	0.54	0.58	0.59	0.6	0.55	0.62
circ-mut	0.88	0.92	0.97	0.93	0.89	0.86	0.95	0.87	0.87
circ-wt
Sample Name	firefly	renilla	firefly/renilla
Control-1	15428.1	14025.5	1.1
Control-2	14656	14804	0.99
Control-3	14522.2	14099.3	1.03
Control-4	13493.8	14355.1	0.94
Control-5	14700	14134.6	1.04
Control-6	14864.8	14864.8	1
Control-7	13475.5	14037	0.96
Control-8	14451.2	14167.9	1.02
Control-9	15351	14620	1.05
miR-NC-1	14185.6	14045.2	1.01
miR-NC-2	15799.4	14494.8	1.09
miR-NC-3	15811.5	14640.2	1.08
miR-NC-4	14722.7	14156.4	1.04
miR-NC-5	15880.2	14178.7	1.12
miR-NC-6	15237.8	14512.2	1.05
miR-NC-7	15642.3	14483.6	1.08
miR-NC-8	15809.3	14115.5	1.12
miR-NC-9	14038.4	14472.6	0.97
miR-526b mimic-1	7465.08	14085.1	0.53
miR-526b mimic-2	8568.9	14523.6	0.59
miR-526b mimic-3	9171.39	14109.8	0.65
miR-526b mimic-4	7575.46	14028.6	0.54
miR-526b mimic-5	8451.78	14572	0.58
miR-526b mimic-6	8738.32	14810.7	0.59
miR-526b mimic-7	8631.49	14385.8	0.6
miR-526b mimic-8	8115.8	14756	0.55
miR-526b mimic-9	9223.22	14876.2	0.62
circ-mut
Sample Name	firefly	renilla	firefly/renilla
Control-1	13039.6	14173.5	0.92
Control-2	13279	14754.4	0.9
Control-3	13341.9	14193.5	0.94
Control-4	16466.2	14969.3	1.1
Control-5	14843.4	14003.2	1.06
Control-6	15399.9	14392.4	1.07
Control-7	13016.5	14961.5	0.87
Control-8	13742	14314.6	0.96
Control-9	12332.8	14681.9	0.84
miR-NC-1	15181.8	14597.9	1.04
miR-NC-2	14908.6	14064.8	1.06
miR-NC-3	16482	14332.2	1.15
miR-NC-4	14075.1	14362.4	0.98
miR-NC-5	13162.2	14789	0.89
miR-NC-6	16034	14576.3	1.1
miR-NC-7	15918.2	14340.8	1.11
miR-NC-8	15696.2	14014.4	1.12
miR-NC-9	14009.3	14442.6	0.97
miR-526b mimic-1	13084.6	14868.9	0.88
miR-526b mimic-2	13612.6	14796.3	0.92
miR-526b mimic-3	14266.2	14707.4	0.97
miR-526b mimic-4	13052	14034.4	0.93
miR-526b mimic-5	12979.7	14583.9	0.89
miR-526b mimic-6	12846.2	14937.4	0.86
miR-526b mimic-7	13981.6	14717.4	0.95
miR-526b mimic-8	12579.2	14458.9	0.87
miR-526b mimic-9	12393.6	14245.5	0.87
4b
Control	sh-NC	sh-circ
0.97	0.88	2.55
0.99	0.99	2.78
1.04	0.99	2.42
1.01	0.92	2.6
1	0.97	2.42
0.98	0.85	2.82
0.97	0.86	2.81
1.05	0.94	2.47
0.96	0.92	2.59
Repeat	Sample Name	Target Name	CT	mean	Target Name	CT	mean	△CT	△△CT	2^(-△△CT)	2 decimal
normalization	nor-1	miR-526b	22.6111	24.7356	U6	20.8064	19.2251	5.5105	0	1	1
	nor-2	miR-526b	25.6783		U6	18.5865
	nor-3	miR-526b	25.9173		U6	18.2822
1	control-1	miR-526b	25.9733	25.9385	U6	20.23	20.3778	5.5607	0.0502	0.9658	0.97
	control-2	miR-526b	26.0614		U6	20.6405
	control-3	miR-526b	25.7809		U6	20.263
2	control-1	miR-526b	25.4056	25.8225	U6	19.9024	20.3014	5.5211	0.0106	0.9927	0.99
	control-2	miR-526b	25.9878		U6	20.4539
	control-3	miR-526b	26.0742		U6	20.5479
3	control-1	miR-526b	25.6569	24.7967	U6	20.1793	19.3464	5.4503	-0.0602	1.0426	1.04
	control-2	miR-526b	25.3569		U6	19.8514
	control-3	miR-526b	23.3764		U6	18.0085
4	control-1	miR-526b	24.5755	24.7132	U6	18.9577	19.2126	5.5005	-0.01	1.007	1.01
	control-2	miR-526b	24.4784		U6	18.9511
	control-3	miR-526b	25.0855		U6	19.7292
5	control-1	miR-526b	25.2304	25.284	U6	19.6917	19.775	5.5089	-0.0016	1.0011	1
	control-2	miR-526b	25.3026		U6	19.812
	control-3	miR-526b	25.319		U6	19.8215
6	control-1	miR-526b	25.9894	24.6648	U6	20.4968	19.1273	5.5375	0.027	0.9815	0.98
	control-2	miR-526b	24.3043		U6	18.6802
	control-3	miR-526b	23.7007		U6	18.205
7	control-1	miR-526b	25.3126	24.3745	U6	19.6323	18.818	5.5565	0.046	0.9686	0.97
	control-2	miR-526b	23.9103		U6	18.3457
	control-3	miR-526b	23.9008		U6	18.4761
8	control-1	miR-526b	23.6689	24.553	U6	18.1723	19.108	5.445	-0.0655	1.0465	1.05
	control-2	miR-526b	26.2696		U6	20.8044
	control-3	miR-526b	23.7205		U6	18.3473
9	control-1	miR-526b	25.2973	24.9017	U6	19.7814	19.3348	5.5669	0.0564	0.9617	0.96
	control-2	miR-526b	23.9693		U6	18.4136
	control-3	miR-526b	25.4386		U6	19.8094
1	sh-NC-1	miR-526b	23.8568	25.2556	U6	18.2652	19.5539	5.7017	0.1912	0.8759	0.88
	sh-NC-2	miR-526b	25.9166		U6	20.3781
	sh-NC-3	miR-526b	25.9935		U6	20.0184
2	sh-NC-1	miR-526b	23.9016	24.5371	U6	18.3315	19.0172	5.5199	0.0094	0.9935	0.99
	sh-NC-2	miR-526b	25.478		U6	19.9728
	sh-NC-3	miR-526b	24.2318		U6	18.7472
3	sh-NC-1	miR-526b	24.0565	24.981	U6	18.6621	19.4488	5.5322	0.0216	0.9851	0.99
	sh-NC-2	miR-526b	24.8775		U6	19.4625
	sh-NC-3	miR-526b	26.0089		U6	20.2219
4	sh-NC-1	miR-526b	24.3718	24.7126	U6	18.6884	19.0752	5.6374	0.1269	0.9158	0.92
	sh-NC-2	miR-526b	25.6246		U6	20.0652
	sh-NC-3	miR-526b	24.1415		U6	18.4719
5	sh-NC-1	miR-526b	25.0172	25.6846	U6	19.5004	20.1306	5.554	0.0435	0.9703	0.97
	sh-NC-2	miR-526b	25.6512		U6	20.0218
	sh-NC-3	miR-526b	26.3853		U6	20.8695
6	sh-NC-1	miR-526b	25.3494	25.1039	U6	19.5817	19.3585	5.7454	0.2349	0.8498	0.85
	sh-NC-2	miR-526b	25.3125		U6	19.4958
	sh-NC-3	miR-526b	24.6498		U6	18.998
7	sh-NC-1	miR-526b	25.6046	25.2593	U6	19.6157	19.5245	5.7348	0.2243	0.856	0.86
	sh-NC-2	miR-526b	24.8008		U6	19.2092
	sh-NC-3	miR-526b	25.3725		U6	19.7484
8	sh-NC-1	miR-526b	26.6155	25.2093	U6	20.7836	19.6049	5.6043	0.0938	0.937	0.94
	sh-NC-2	miR-526b	23.6443		U6	18.0898
	sh-NC-3	miR-526b	25.368		U6	19.9414
9	sh-NC-1	miR-526b	25.1182	24.7408	U6	19.631	19.1023	5.6385	0.128	0.9151	0.92
	sh-NC-2	miR-526b	24.0585		U6	18.5998
	sh-NC-3	miR-526b	25.0456		U6	19.0759
1	sh-circ-1	miR-526b	22.322	22.6491	U6	18.2125	18.4881	4.161	-1.3496	2.5484	2.55
	sh-circ-2	miR-526b	23.4392		U6	19.2504
	sh-circ-3	miR-526b	22.186		U6	18.0015
2	sh-circ-1	miR-526b	22.7862	23.6795	U6	18.7732	19.6448	4.0348	-1.4758	2.7813	2.78
	sh-circ-2	miR-526b	24.8108		U6	20.7744
	sh-circ-3	miR-526b	23.4416		U6	19.3867
3	sh-circ-1	miR-526b	22.7653	23.8559	U6	18.4752	19.6204	4.2355	-1.275	2.4199	2.42
	sh-circ-2	miR-526b	24.3966		U6	20.1854
	sh-circ-3	miR-526b	24.4059		U6	20.2006
4	sh-circ-1	miR-526b	22.2675	23.3035	U6	18.146	19.1703	4.1332	-1.3773	2.5979	2.6
	sh-circ-2	miR-526b	24.8891		U6	20.7847
	sh-circ-3	miR-526b	22.7539		U6	18.5802
5	sh-circ-1	miR-526b	22.5976	23.5875	U6	18.3398	19.3518	4.2357	-1.2748	2.4197	2.42
	sh-circ-2	miR-526b	24.784		U6	20.5676
	sh-circ-3	miR-526b	23.3809		U6	19.1482
6	sh-circ-1	miR-526b	22.5063	22.4096	U6	18.4991	18.3964	4.0131	-1.4974	2.8233	2.82
	sh-circ-2	miR-526b	22.3315		U6	18.2666
	sh-circ-3	miR-526b	22.3909		U6	18.4236
7	sh-circ-1	miR-526b	23.3695	23.3453	U6	19.3566	19.3257	4.0196	-1.4909	2.8107	2.81
	sh-circ-2	miR-526b	22.987		U6	18.9125
	sh-circ-3	miR-526b	23.6795		U6	19.7082
8	sh-circ-1	miR-526b	24.5348	23.8016	U6	20.2689	19.5931	4.2085	-1.302	2.4657	2.47
	sh-circ-2	miR-526b	24.0735		U6	19.8005
	sh-circ-3	miR-526b	22.7966		U6	18.71
9	sh-circ-1	miR-526b	23.9574	22.9768	U6	19.8448	18.8396	4.1373	-1.3733	2.5905	2.59
	sh-circ-2	miR-526b	22.3718		U6	18.2425
	sh-circ-3	miR-526b	22.6013		U6	18.4315
4c
Control	OGD/R
0.99	0.4
0.89	0.4
1.15	0.29
1.05	0.35
1.05	0.37
1.09	0.48
1.11	0.36
0.86	0.48
0.89	0.41
Repeat	Sample Name	Target Name	CT	mean	Target Name	CT	mean	△CT	△△CT	2^(-△△CT)	2 decimal
normalization	nor-1	miR-526b	24.5658	24.2216	U6	18.4188	19.1816	5.04	0	1	1
	nor-2	miR-526b	24.9117		U6	19.5159
	nor-3	miR-526b	23.1874		U6	19.6101
1	control-1	miR-526b	25.0254	24.3964	U6	20.1796	19.3362	5.0602	0.0201	0.9861	0.99
	control-2	miR-526b	24.3152		U6	19.2573
	control-3	miR-526b	23.8486		U6	18.5717
2	control-1	miR-526b	25.9048	24.2708	U6	20.6615	19.0665	5.2043	0.1643	0.8924	0.89
	control-2	miR-526b	23.4165		U6	18.2339
	control-3	miR-526b	23.4911		U6	18.3041
3	control-1	miR-526b	25.4509	24.7827	U6	20.6763	19.9418	4.8409	-0.1992	1.148	1.15
	control-2	miR-526b	23.5657		U6	18.7766
	control-3	miR-526b	25.3315		U6	20.3725
4	control-1	miR-526b	25.4843	25.2933	U6	20.5924	20.3193	4.974	-0.0661	1.0469	1.05
	control-2	miR-526b	24.3065		U6	19.3801
	control-3	miR-526b	26.089		U6	20.9854
5	control-1	miR-526b	23.2974	23.8256	U6	18.2917	18.85	4.9756	-0.0644	1.0457	1.05
	control-2	miR-526b	24.1104		U6	18.9683
	control-3	miR-526b	24.0691		U6	19.2901
6	control-1	miR-526b	24.3347	24.907	U6	19.4522	19.9886	4.9184	-0.1216	1.088	1.09
	control-2	miR-526b	24.8992		U6	19.8933
	control-3	miR-526b	25.4869		U6	20.6201
7	control-1	miR-526b	23.5531	24.379	U6	18.6003	19.4873	4.8917	-0.1483	1.1083	1.11
	control-2	miR-526b	25.9117		U6	20.9953
	control-3	miR-526b	23.6723		U6	18.8663
8	control-1	miR-526b	24.9063	24.038	U6	19.7307	18.7861	5.2519	0.2119	0.8634	0.86
	control-2	miR-526b	23.7326		U6	18.4894
	control-3	miR-526b	23.4753		U6	18.1383
9	control-1	miR-526b	25.0024	25.6921	U6	19.8982	20.4843	5.2078	0.1678	0.8902	0.89
	control-2	miR-526b	26.0453		U6	20.8218
	control-3	miR-526b	26.0287		U6	20.733
1	OGD/R-1	miR-526b	25.2269	25.6386	U6	19.0662	19.2793	6.3593	1.3193	0.4007	0.4
	OGD/R-2	miR-526b	25.9116		U6	19.5427
	OGD/R-3	miR-526b	25.7774		U6	19.2289
2	OGD/R-1	miR-526b	24.8483	25.3696	U6	18.59	19.0015	6.3681	1.328	0.3983	0.4
	OGD/R-2	miR-526b	24.7287		U6	18.235
	OGD/R-3	miR-526b	26.5317		U6	20.1795
3	OGD/R-1	miR-526b	26.5329	26.6457	U6	19.7233	19.8282	6.8174	1.7774	0.2917	0.29
	OGD/R-2	miR-526b	26.7712		U6	20.0415
	OGD/R-3	miR-526b	26.633		U6	19.7199
4	OGD/R-1	miR-526b	25.8193	26.4626	U6	19.7086	19.8879	6.5746	1.5346	0.3452	0.35
	OGD/R-2	miR-526b	26.1122		U6	19.5554
	OGD/R-3	miR-526b	27.4561		U6	20.3997
5	OGD/R-1	miR-526b	26.9106	26.6499	U6	20.5022	20.1606	6.4893	1.4493	0.3662	0.37
	OGD/R-2	miR-526b	26.2904		U6	20.0097
	OGD/R-3	miR-526b	26.7487		U6	19.9698
6	OGD/R-1	miR-526b	26.3329	26.3606	U6	20.3124	20.2477	6.1129	1.0729	0.4754	0.48
	OGD/R-2	miR-526b	25.9746		U6	19.6967
	OGD/R-3	miR-526b	26.7744		U6	20.7341
7	OGD/R-1	miR-526b	27.1495	26.9936	U6	20.7839	20.4613	6.5323	1.4923	0.3555	0.36
	OGD/R-2	miR-526b	27.3862		U6	20.584
	OGD/R-3	miR-526b	26.4451		U6	20.016
8	OGD/R-1	miR-526b	24.2616	25.2375	U6	18.2117	19.1308	6.1067	1.0667	0.4774	0.48
	OGD/R-2	miR-526b	24.9593		U6	18.9467
	OGD/R-3	miR-526b	26.4915		U6	20.2338
9	OGD/R-1	miR-526b	26.4624	26.0336	U6	20.1487	19.7023	6.3313	1.2913	0.4086	0.41
	OGD/R-2	miR-526b	26.7392		U6	20.4051
	OGD/R-3	miR-526b	24.8993		U6	18.5532

## Sheet: figure 5
5a
Control	miR-NC	miR-526b inhibitor
0.93	0.91	0.41
1.17	0.91	0.49
1.06	0.97	0.46
0.89	0.99	0.43
1.02	0.94	0.44
1	1.08	0.42
0.88	0.88	0.41
0.94	0.84	0.46
0.93	0.85	0.44
Repeat	Sample Name	Target Name	CT	mean	Target Name	CT	mean	△CT	△△CT	2^(-△△CT)	2 decimal
normalization	nor-1	miR-526b	25.9742	26.6823	U6	20.8207	19.7893	6.893	0	1	1
	nor-2	miR-526b	26.811		U6	20.352
	nor-3	miR-526b	27.2618		U6	18.1951
1	control-1	miR-526b	27.8387	26.4616	U6	20.9038	19.4584	7.0032	0.1102	0.9265	0.93
	control-2	miR-526b	26.2488		U6	19.1846
	control-3	miR-526b	25.2973		U6	18.2868
2	control-1	miR-526b	24.6395	25.1511	U6	18.0633	18.4787	6.6724	-0.2206	1.1652	1.17
	control-2	miR-526b	25.4328		U6	18.7388
	control-3	miR-526b	25.3811		U6	18.6341
3	control-1	miR-526b	27.0094	26.4792	U6	20.3668	19.6676	6.8117	-0.0814	1.058	1.06
	control-2	miR-526b	25.5681		U6	18.6719
	control-3	miR-526b	26.8602		U6	19.9641
4	control-1	miR-526b	26.895	25.7244	U6	19.7176	18.6569	7.0675	0.1744	0.8861	0.89
	control-2	miR-526b	25.1218		U6	18.1329
	control-3	miR-526b	25.1564		U6	18.1203
5	control-1	miR-526b	26.2033	26.6456	U6	19.3398	19.7841	6.8616	-0.0315	1.0221	1.02
	control-2	miR-526b	26.8724		U6	20.0027
	control-3	miR-526b	26.8612		U6	20.0097
6	control-1	miR-526b	24.9826	25.8213	U6	18.0675	18.9317	6.8896	-0.0035	1.0024	1
	control-2	miR-526b	25.106		U6	18.2466
	control-3	miR-526b	27.3752		U6	20.481
7	control-1	miR-526b	25.9363	26.168	U6	18.9312	19.0889	7.0791	0.186	0.879	0.88
	control-2	miR-526b	26.4668		U6	19.4911
	control-3	miR-526b	26.1008		U6	18.8445
8	control-1	miR-526b	26.6181	26.022	U6	19.6887	19.0386	6.9834	0.0903	0.9393	0.94
	control-2	miR-526b	25.7562		U6	18.946
	control-3	miR-526b	25.6916		U6	18.4811
9	control-1	miR-526b	26.471	27.0899	U6	19.3772	20.0911	6.9988	0.1058	0.9293	0.93
	control-2	miR-526b	27.9348		U6	20.9372
	control-3	miR-526b	26.8639		U6	19.9588
1	miR-NC-1	miR-526b	26.4876	27.2937	U6	19.5187	20.2605	7.0332	0.1401	0.9074	0.91
	miR-NC-2	miR-526b	27.3848		U6	20.2807
	miR-NC-3	miR-526b	28.0086		U6	20.982
2	miR-NC-1	miR-526b	26.2334	27.1674	U6	19.2328	20.1367	7.0307	0.1377	0.909	0.91
	miR-NC-2	miR-526b	27.6001		U6	20.5542
	miR-NC-3	miR-526b	27.6688		U6	20.6229
3	miR-NC-1	miR-526b	25.2323	25.5106	U6	18.1383	18.5687	6.9419	0.0489	0.9667	0.97
	miR-NC-2	miR-526b	25.4193		U6	18.5633
	miR-NC-3	miR-526b	25.8802		U6	19.0044
4	miR-NC-1	miR-526b	27.1037	26.4228	U6	20.2215	19.5124	6.9104	0.0174	0.988	0.99
	miR-NC-2	miR-526b	26.1701		U6	19.0969
	miR-NC-3	miR-526b	25.9946		U6	19.2187
5	miR-NC-1	miR-526b	27.3213	27.2451	U6	20.3843	20.2578	6.9874	0.0943	0.9367	0.94
	miR-NC-2	miR-526b	27.8679		U6	20.8012
	miR-NC-3	miR-526b	26.5463		U6	19.5879
6	miR-NC-1	miR-526b	26.0725	26.5354	U6	19.32	19.7556	6.7798	-0.1132	1.0816	1.08
	miR-NC-2	miR-526b	26.471		U6	19.7184
	miR-NC-3	miR-526b	27.0627		U6	20.2283
7	miR-NC-1	miR-526b	26.6313	27.0127	U6	19.5856	19.9313	7.0814	0.1884	0.8776	0.88
	miR-NC-2	miR-526b	27.4442		U6	20.2909
	miR-NC-3	miR-526b	26.9625		U6	19.9173
8	miR-NC-1	miR-526b	25.621	26.1534	U6	18.5658	19.0053	7.1481	0.255	0.838	0.84
	miR-NC-2	miR-526b	25.6232		U6	18.4652
	miR-NC-3	miR-526b	27.2159		U6	19.9849
9	miR-NC-1	miR-526b	27.5065	27.3937	U6	20.4046	20.2633	7.1304	0.2373	0.8483	0.85
	miR-NC-2	miR-526b	27.136		U6	19.9177
	miR-NC-3	miR-526b	27.5385		U6	20.4676
1	miR-526b inhibitor-1	miR-526b	28.8849	27.6448	U6	20.7652	19.4484	8.1964	1.3034	0.4052	0.41
	miR-526b inhibitor-2	miR-526b	27.3929		U6	19.4903
	miR-526b inhibitor-3	miR-526b	26.6567		U6	18.0898
2	miR-526b inhibitor-1	miR-526b	26.9034	27.6677	U6	18.9624	19.7366	7.9311	1.0381	0.487	0.49
	miR-526b inhibitor-2	miR-526b	28.0184		U6	19.8544
	miR-526b inhibitor-3	miR-526b	28.0814		U6	20.393
3	miR-526b inhibitor-1	miR-526b	28.1126	27.6595	U6	20.288	19.6472	8.0123	1.1193	0.4603	0.46
	miR-526b inhibitor-2	miR-526b	27.691		U6	19.6686
	miR-526b inhibitor-3	miR-526b	27.1748		U6	18.9849
4	miR-526b inhibitor-1	miR-526b	28.3517	28.3129	U6	20.1899	20.2091	8.1037	1.2107	0.4321	0.43
	miR-526b inhibitor-2	miR-526b	28.1151		U6	20.0393
	miR-526b inhibitor-3	miR-526b	28.4718		U6	20.3982
5	miR-526b inhibitor-1	miR-526b	28.4001	27.9053	U6	19.944	19.82	8.0853	1.1923	0.4376	0.44
	miR-526b inhibitor-2	miR-526b	27.5565		U6	19.4211
	miR-526b inhibitor-3	miR-526b	27.7595		U6	20.0949
6	miR-526b inhibitor-1	miR-526b	28.6961	27.5688	U6	20.5273	19.439	8.1298	1.2368	0.4243	0.42
	miR-526b inhibitor-2	miR-526b	27.6051		U6	19.4415
	miR-526b inhibitor-3	miR-526b	26.4051		U6	18.3482
7	miR-526b inhibitor-1	miR-526b	26.4436	26.8803	U6	18.2199	18.7007	8.1796	1.2866	0.4099	0.41
	miR-526b inhibitor-2	miR-526b	26.1283		U6	18.1184
	miR-526b inhibitor-3	miR-526b	28.069		U6	19.7636
8	miR-526b inhibitor-1	miR-526b	26.9044	28.0536	U6	19.0879	20.03	8.0235	1.1305	0.4568	0.46
	miR-526b inhibitor-2	miR-526b	28.9174		U6	20.4961
	miR-526b inhibitor-3	miR-526b	28.3389		U6	20.506
9	miR-526b inhibitor-1	miR-526b	27.2518	27.111	U6	19.4137	19.0354	8.0756	1.1826	0.4406	0.44
	miR-526b inhibitor-2	miR-526b	26.6098		U6	18.5395
	miR-526b inhibitor-3	miR-526b	27.4714		U6	19.1529
5b
I	II	III	IV	V	VI
87.19	56.83	50.28	75.75	74.42	56.54
85.04	44.3	50.82	88.95	80.32	66.22
114.27	50.72	43.63	79.2	87.1	62.24
91.19	50.37	51.39	77.21	78.56	62.71
107.4	52.74	48.86	72.71	75.78	59.41
102.13	48.16	47.42	71.38	83.65	60.78
98.29	48.39	54.01	69.28	83.82	60.96
92.22	42.31	52.37	72.84	81.33	70.94
104.12	47.94	53.49	74.8	77.21	60.42
Repeat	OD blank	Mean OD blank	OD negative	Mean OD negative
1	5.75e-05	0.000118067	0.506267	0.482524
	0.0002269		0.461579
	6.98e-05		0.479726
2	0.0002408	0.000132967	0.521602	0.513198
	9.8e-05		0.49008
	6.01e-05		0.527911
3	7.71e-05	0.000192433	0.45731	0.497424
	0.0002974		0.540601
	0.0002028		0.49436
Repeat	Sample Name	OD	Mean OD	Cell viability (%)
1	group I-1	0.37703	0.420707	87.19
	group I-2	0.404868
	group I-3	0.480222
1	group II-1	0.219177	0.27425	56.83
	group II-2	0.30047
	group II-3	0.303103
1	group III-1	0.347151	0.242692	50.28
	group III-2	0.086329
	group III-3	0.294595
1	group IV-1	0.361295	0.365556	75.75
	group IV-2	0.453857
	group IV-3	0.281516
1	group V-1	0.214335	0.359107	74.42
	group V-2	0.292617
	group V-3	0.57037
1	group VI-1	0.376155	0.272883	56.54
	group VI-2	0.24835
	group VI-3	0.194145
2	group I-1	0.304249	0.436441	85.04
	group I-2	0.400036
	group I-3	0.605038
2	group II-1	0.188521	0.2274	44.3
	group II-2	0.191273
	group II-3	0.302405
2	group III-1	0.291	0.260849	50.82
	group III-2	0.196802
	group III-3	0.294746
2	group IV-1	0.251932	0.456519	88.95
	group IV-2	0.517908
	group IV-3	0.599717
2	group V-1	0.41825	0.412234	80.32
	group V-2	0.452895
	group V-3	0.365557
2	group VI-1	0.300027	0.339908	66.22
	group VI-2	0.295989
	group VI-3	0.423708
3	group I-1	0.417823	0.568384	114.27
	group I-2	0.631206
	group I-3	0.656122
3	group II-1	0.175543	0.252386	50.72
	group II-2	0.293272
	group II-3	0.288344
3	group III-1	0.302855	0.217153	43.63
	group III-2	0.205161
	group III-3	0.143442
3	group IV-1	0.391227	0.393988	79.2
	group IV-2	0.450884
	group IV-3	0.339854
3	group V-1	0.558665	0.433276	87.1
	group V-2	0.351505
	group V-3	0.389658
3	group VI-1	0.272188	0.309689	62.24
	group VI-2	0.301465
	group VI-3	0.355414
Repeat	OD blank	Mean OD blank	OD negative	Mean OD negative
4	0.0002534	0.000242167	0.504581	0.481119
	0.0002049		0.455907
	0.0002682		0.482868
5	0.0002573	0.0001434	0.530652	0.524489
	7.29e-05		0.532402
	0.0001		0.510414
6	0.0002948	0.000282767	0.477088	0.474947
	0.0002587		0.457251
	0.0002948		0.490502
Repeat	Sample Name	OD	Mean OD	Cell viability (%)
4	group I-1	0.34475	0.438752	91.19
	group I-2	0.49192
	group I-3	0.479585
4	group II-1	0.194291	0.242456	50.37
	group II-2	0.288565
	group II-3	0.244513
4	group III-1	0.260884	0.247361	51.39
	group III-2	0.109169
	group III-3	0.372029
4	group IV-1	0.46687	0.371539	77.21
	group IV-2	0.370528
	group IV-3	0.277218
4	group V-1	0.345255	0.378038	78.56
	group V-2	0.416026
	group V-3	0.372833
4	group VI-1	0.356129	0.30178	62.71
	group VI-2	0.253945
	group VI-3	0.295267
5	group I-1	0.788153	0.563277	107.4
	group I-2	0.374456
	group I-3	0.527222
5	group II-1	0.255909	0.276664	52.74
	group II-2	0.275589
	group II-3	0.298494
5	group III-1	0.288493	0.256327	48.86
	group III-2	0.085044
	group III-3	0.395444
5	group IV-1	0.367813	0.381389	72.71
	group IV-2	0.52229
	group IV-3	0.254065
5	group V-1	0.496305	0.39747	75.78
	group V-2	0.365745
	group V-3	0.33036
5	group VI-1	0.141021	0.31166	59.41
	group VI-2	0.239435
	group VI-3	0.554523
6	group I-1	0.419107	0.485047	102.13
	group I-2	0.45458
	group I-3	0.581454
6	group II-1	0.28271	0.228889	48.16
	group II-2	0.177833
	group II-3	0.226125
6	group III-1	0.299887	0.225382	47.42
	group III-2	0.276408
	group III-3	0.099851
6	group IV-1	0.540079	0.339115	71.38
	group IV-2	0.255069
	group IV-3	0.222197
6	group V-1	0.164859	0.397341	83.65
	group V-2	0.510827
	group V-3	0.516338
6	group VI-1	0.389288	0.288781	60.78
	group VI-2	0.271766
	group VI-3	0.205289
Repeat	OD blank	Mean OD blank	OD negative	Mean OD negative
7	0.0002872	0.000237933	0.501568	0.492026
	0.0001584		0.515326
	0.0002682		0.459184
8	0.0002502	0.000170667	0.514988	0.509603
	6.73e-05		0.508341
	0.0001945		0.505481
9	0.0002945	0.000263967	0.478633	0.500715
	0.0002845		0.4921
	0.0002129		0.531412
Repeat	Sample Name	OD	Mean OD	Cell viability (%)
7	group I-1	0.579605	0.48364	98.29
	group I-2	0.444914
	group I-3	0.426402
7	group II-1	0.158069	0.238238	48.39
	group II-2	0.192936
	group II-3	0.36371
7	group III-1	0.204068	0.265876	54.01
	group III-2	0.395861
	group III-3	0.197699
7	group IV-1	0.217956	0.340949	69.28
	group IV-2	0.487227
	group IV-3	0.317665
7	group V-1	0.423919	0.412453	83.82
	group V-2	0.302072
	group V-3	0.511368
7	group VI-1	0.208894	0.300018	60.96
	group VI-2	0.403403
	group VI-3	0.287756
8	group I-1	0.696865	0.469962	92.22
	group I-2	0.388277
	group I-3	0.324744
8	group II-1	0.221723	0.215736	42.31
	group II-2	0.115072
	group II-3	0.310413
8	group III-1	0.446478	0.266975	52.37
	group III-2	0.080518
	group III-3	0.27393
8	group IV-1	0.181924	0.371227	72.84
	group IV-2	0.495958
	group IV-3	0.435799
8	group V-1	0.280206	0.414512	81.33
	group V-2	0.475127
	group V-3	0.488203
8	group VI-1	0.275539	0.361559	70.94
	group VI-2	0.561937
	group VI-3	0.2472
9	group I-1	0.484392	0.521323	104.12
	group I-2	0.542364
	group I-3	0.537212
9	group II-1	0.393091	0.24017	47.94
	group II-2	0.138085
	group II-3	0.189334
9	group III-1	0.151219	0.267978	53.49
	group III-2	0.367309
	group III-3	0.285405
9	group IV-1	0.14697	0.37462	74.8
	group IV-2	0.468029
	group IV-3	0.508861
9	group V-1	0.414768	0.386639	77.21
	group V-2	0.336847
	group V-3	0.408303
9	group VI-1	0.244187	0.302634	60.42
	group VI-2	0.319668
	group VI-3	0.344046

## Sheet: figure 6
6a
I	II	III	IV	V	VI
113.86	202.9	235.41	137.42	163.88	178.73
121.44	213.6	225.71	154.97	117.58	187.38
101.99	177.58	211.34	142.32	158.2	208.3
101.08	207.32	249.08	135.31	122.7	187.78
117.25	200.37	213.53	131.15	139.44	158.95
87.79	238	208.68	142.68	117.87	168.32
107.62	217.49	218.71	128.32	125.46	199.21
89.06	185.01	205.49	148.22	157.27	175.71
94.23	223.74	213.49	144.1	146.25	184.38
6b
I	II	III	IV	V	VI
0.92	3.58	3.57	2.72	2.44	2.94
1.03	4.02	4	2.58	2.55	3.39
1.03	3.23	3.68	2.48	2.7	3.39
0.92	3.24	4	2.54	2.72	3.52
1.03	3.55	3.52	2.48	2.29	3.01
0.95	3.91	3.23	2.43	2.92	2.96
1.04	3.72	4.1	2.45	2.91	3.28
0.93	3.61	3.8	2.53	2.62	3
0.93	3.69	3.43	2.71	2.45	3.22
pg/mL	OD
15	0.061981
50	0.08161
100	0.135184
450	0.371919
500	0.615113
y = 0.001x + 0.0357
		OD	pg/mL	mean	normalization
	nor-1	0.0952961	59.5961	53.0305	1
	nor-2	0.0435314	7.83143
	nor-3	0.127364	91.6638
			y	x
	Repeat	Sample Name	OD	pg/mL	计算mean	fold change				Repeat	Sample Name	OD	pg/mL	计算mean	fold change
	1	group I-1	0.08433	48.6302	48.9426	0.92				1	group II-1	0.228603	192.903	189.963	3.58
		group I-2	0.081848	46.1481							group II-2	0.221234	185.534
		group I-3	0.08775	52.0496							group II-3	0.227152	191.452
	2	group I-1	0.086351	50.6507	54.7946	1.03				2	group II-1	0.255483	219.783	213.324	4.02
		group I-2	0.093457	57.7569							group II-2	0.252827	217.127
		group I-3	0.091676	55.9762							group II-3	0.238761	203.061
	3	group I-1	0.092001	56.3009	54.8672	1.03				3	group II-1	0.208603	172.903	171.359	3.23
		group I-2	0.091346	55.646							group II-2	0.203458	167.758
		group I-3	0.088355	52.6548							group II-3	0.209114	173.414
	4	group I-1	0.081915	46.2145	48.5238	0.92				4	group II-1	0.21211	176.41	171.828	3.24
		group I-2	0.087736	52.0362							group II-2	0.204508	168.808
		group I-3	0.083021	47.3206							group II-3	0.205968	170.268
	5	group I-1	0.081873	46.1729	54.4672	1.03				5	group II-1	0.231183	195.483	188.424	3.55
		group I-2	0.096532	60.8323							group II-2	0.227944	192.244
		group I-3	0.092096	56.3963							group II-3	0.213246	177.546
	6	group I-1	0.090847	55.1472	50.5854	0.95				6	group II-1	0.236034	200.334	207.112	3.91
		group I-2	0.08534	49.6396							group II-2	0.253797	218.097
		group I-3	0.082669	46.9694							group II-3	0.238603	202.903
	7	group I-1	0.096058	60.3576	55.0069	1.04				7	group II-1	0.238774	203.074	197.161	3.72
		group I-2	0.086806	51.1063							group II-2	0.230433	194.733
		group I-3	0.089257	53.5567							group II-3	0.229375	193.675
	8	group I-1	0.086399	50.6989	49.4492	0.93				8	group II-1	0.229657	193.957	191.382	3.61
		group I-2	0.079855	44.1545							group II-2	0.224467	188.767
		group I-3	0.089194	53.4943							group II-3	0.227121	191.421
	9	group I-1	0.079472	43.7715	49.0618	0.93				9	group II-1	0.234453	198.753	195.564	3.69
		group I-2	0.082646	46.9464							group II-2	0.229911	194.211
		group I-3	0.092167	56.4675							group II-3	0.229428	193.728
	Repeat	Sample Name	OD	pg/mL	计算mean	fold change				Repeat	Sample Name	OD	pg/mL	计算mean	fold change
	1	group III-1	0.227946	192.246	189.334	3.57				1	group IV-1	0.190599	154.899	144.502	2.72
		group III-2	0.227465	191.765							group IV-2	0.167827	132.127
		group III-3	0.219692	183.992							group IV-3	0.18218	146.48
	2	group III-1	0.243961	208.261	211.977	4				2	group IV-1	0.162172	126.472	136.638	2.58
		group III-2	0.246789	211.089							group IV-2	0.166325	130.625
		group III-3	0.252281	216.581							group IV-3	0.188515	152.815
	3	group III-1	0.225928	190.228	194.934	3.68				3	group IV-1	0.172237	136.537	131.309	2.48
		group III-2	0.229239	193.539							group IV-2	0.16784	132.14
		group III-3	0.236735	201.035							group IV-3	0.16095	125.25
	4	group III-1	0.244889	209.189	212.014	4				4	group IV-1	0.167817	132.117	134.792	2.54
		group III-2	0.246286	210.586							group IV-2	0.171125	135.425
		group III-3	0.251968	216.268							group IV-3	0.172535	136.835
	5	group III-1	0.216097	180.397	186.674	3.52				5	group IV-1	0.162998	127.298	131.482	2.48
		group III-2	0.221173	185.473							group IV-2	0.169168	133.468
		group III-3	0.229853	194.153							group IV-3	0.169379	133.679
	6	group III-1	0.20525	169.55	171.298	3.23				6	group IV-1	0.15843	122.73	128.756	2.43
		group III-2	0.214858	179.158							group IV-2	0.16943	133.73
		group III-3	0.200886	165.186							group IV-3	0.165508	129.808
	7	group III-1	0.267875	232.175	217.194	4.1				7	group IV-1	0.16873	133.03	129.851	2.45
		group III-2	0.244827	209.127							group IV-2	0.157457	121.757
		group III-3	0.245981	210.281							group IV-3	0.170465	134.765
	8	group III-1	0.244555	208.855	201.555	3.8				8	group IV-1	0.175504	139.804	133.969	2.53
		group III-2	0.233502	197.802							group IV-2	0.16252	126.82
		group III-3	0.233709	198.009							group IV-3	0.170984	135.284
	9	group III-1	0.221433	185.733	182.101	3.43				9	group IV-1	0.185406	149.706	143.69	2.71
		group III-2	0.220492	184.792							group IV-2	0.167996	132.296
		group III-3	0.211478	175.778							group IV-3	0.184769	149.069
	Repeat	Sample Name	OD	pg/mL	计算mean	fold change				Repeat	Sample Name	OD	pg/mL	计算mean	fold change
	1	group V-1	0.167916	132.216	129.234	2.44				1	group VI-1	0.202446	166.746	155.676	2.94
		group V-2	0.160255	124.555							group VI-2	0.184404	148.704
		group V-3	0.16663	130.93							group VI-3	0.187277	151.577
	2	group V-1	0.175053	139.353	135.342	2.55				2	group VI-1	0.215647	179.947	179.786	3.39
		group V-2	0.173126	137.426							group VI-2	0.214417	178.717
		group V-3	0.164948	129.248							group VI-3	0.216393	180.693
	3	group V-1	0.182	146.3	143.277	2.7				3	group VI-1	0.213427	177.727	179.953	3.39
		group V-2	0.172033	136.333							group VI-2	0.220213	184.513
		group V-3	0.182898	147.198							group VI-3	0.213321	177.621
	4	group V-1	0.185193	149.493	144.366	2.72				4	group VI-1	0.222461	186.761	186.923	3.52
		group V-2	0.17899	143.29							group VI-2	0.226817	191.117
		group V-3	0.176015	140.315							group VI-3	0.218592	182.892
	5	group V-1	0.17284	137.14	121.448	2.29				5	group VI-1	0.196092	160.392	159.558	3.01
		group V-2	0.150716	115.016							group VI-2	0.196136	160.436
		group V-3	0.147886	112.186							group VI-3	0.193545	157.845
	6	group V-1	0.19603	160.33	154.617	2.92				6	group VI-1	0.183874	148.174	156.811	2.96
		group V-2	0.190172	154.472							group VI-2	0.197198	161.498
		group V-3	0.184751	149.051							group VI-3	0.196462	160.762
	7	group V-1	0.194808	159.108	154.299	2.91				7	group VI-1	0.21406	178.36	173.704	3.28
		group V-2	0.193777	158.077							group VI-2	0.204719	169.019
		group V-3	0.181411	145.711							group VI-3	0.209433	173.733
	8	group V-1	0.156341	120.641	138.943	2.62				8	group VI-1	0.194279	158.579	159.312	3
		group V-2	0.178808	143.108							group VI-2	0.197035	161.335
		group V-3	0.188781	153.081							group VI-3	0.193723	158.023
	9	group V-1	0.157221	121.521	129.984	2.45				9	group VI-1	0.207102	171.402	170.855	3.22
		group V-2	0.171749	136.049							group VI-2	0.209044	173.344
		group V-3	0.168083	132.383							group VI-3	0.203518	167.818
6c
I	II	III	IV	V	VI
0.96	3.03	2.99	1.75	1.98	2.38
1.13	2.99	2.98	1.55	1.57	2.5
0.89	2.49	2.75	1.48	1.98	2.93
0.86	3.37	2.73	1.57	1.73	2.74
0.91	3.23	3.13	1.62	1.35	2.65
1.02	3.37	3.25	1.77	1.83	2.58
1.04	3.53	2.39	1.72	1.86	2.42
1	2.75	3.25	1.75	1.78	3.13
0.97	2.44	2.5	1.68	1.49	2.73
pg/mL	OD
30	0.045138
70	0.11823
200	0.227498
500	0.782784
1000	1.10981
y = 0.0011x + 0.0486
		OD	pg/mL	mean	normalization
	nor-1	0.33752	262.655	294.858	1
	nor-2	0.298331	227.028
	nor-3	0.48298	394.891
	Repeat	Sample Name	OD	pg/mL	mean	fold change				Repeat	Sample Name	OD	pg/mL	mean	fold change
	1	group I-1	0.359577	282.707	283.984	0.96				1	group II-1	1.03662	898.201	893.026	3.03
		group I-2	0.359107	282.279							group II-2	1.0286	890.91
		group I-3	0.364261	286.965							group II-3	1.02756	889.967
	2	group I-1	0.415944	333.949	333.303	1.13				2	group II-1	1.01132	875.197	881.482	2.99
		group I-2	0.411522	329.929							group II-2	1.02723	889.664
		group I-3	0.418234	336.031							group II-3	1.01614	879.586
	3	group I-1	0.334692	260.083	262.495	0.89				3	group II-1	0.861192	738.72	734.138	2.49
		group I-2	0.342418	267.107							group II-2	0.855003	733.093
		group I-3	0.334925	260.295							group II-3	0.85226	730.6
	4	group I-1	0.321048	247.68	253.474	0.86				4	group II-1	1.14286	994.784	993.33	3.37
		group I-2	0.326545	252.678							group II-2	1.15286	1003.87
		group I-3	0.334671	260.064							group II-3	1.12806	981.331
	5	group I-1	0.346442	270.765	268.409	0.91				5	group II-1	1.09205	948.588	952.938	3.23
		group I-2	0.338421	263.474							group II-2	1.09572	951.928
		group I-3	0.346688	270.989							group II-3	1.10273	958.297
	6	group I-1	0.388968	309.426	300.535	1.02				6	group II-1	1.14786	999.328	993.274	3.37
		group I-2	0.37662	298.2							group II-2	1.13742	989.838
		group I-3	0.371978	293.98							group II-3	1.13832	990.657
	7	group I-1	0.376347	297.951	306.922	1.04				7	group II-1	1.19326	1040.6	1040.5	3.53
		group I-2	0.394852	314.775							group II-2	1.19041	1038.01
		group I-3	0.387443	308.039							group II-3	1.19578	1042.89
	8	group I-1	0.372961	294.874	294.483	1				8	group II-1	0.928195	799.632	810.607	2.75
		group I-2	0.368481	290.801							group II-2	0.927083	798.621
		group I-3	0.376151	297.774							group II-3	0.965524	833.567
	9	group I-1	0.37152	293.564	286.764	0.97				9	group II-1	0.836818	716.562	719.668	2.44
		group I-2	0.353359	277.053							group II-2	0.841811	721.101
		group I-3	0.367242	289.674							group II-3	0.842075	721.341
	Repeat	Sample Name	OD	pg/mL	mean	fold change				Repeat	Sample Name	OD	pg/mL	mean	fold change
	1	group III-1	1.01981	882.923	881.143	2.99				1	group IV-1	0.608877	509.343	516.626	1.75
		group III-2	1.01501	878.558							group IV-2	0.617873	517.521
		group III-3	1.01874	881.948							group IV-3	0.623914	523.013
	2	group III-1	1.01928	882.439	878.348	2.98				2	group IV-1	0.555314	460.649	457.482	1.55
		group III-2	1.01673	880.12							group IV-2	0.544562	450.874
		group III-3	1.00833	872.484							group IV-3	0.555614	460.922
	3	group III-1	0.935579	806.345	810.455	2.75				3	group IV-1	0.532527	439.933	436.128	1.48
		group III-2	0.943843	813.857							group IV-2	0.518758	427.416
		group III-3	0.940879	811.162							group IV-3	0.53374	441.036
	4	group III-1	0.921828	793.843	804.863	2.73				4	group IV-1	0.558703	463.73	462.703	1.57
		group III-2	0.940094	810.449							group IV-2	0.558922	463.929
		group III-3	0.939926	810.297							group IV-3	0.555096	460.451
	5	group III-1	1.05987	919.338	922.261	3.13				5	group IV-1	0.566431	470.755	477.342	1.62
		group III-2	1.071	929.459							group IV-2	0.57482	478.382
		group III-3	1.05838	917.987							group IV-3	0.579777	482.888
	6	group III-1	1.10953	964.487	958.681	3.25				6	group IV-1	0.615949	515.772	521.712	1.77
		group III-2	1.09705	953.136							group IV-2	0.628425	527.114
		group III-3	1.10286	958.419							group IV-3	0.623077	522.252
	7	group III-1	0.828631	709.119	704.04	2.39				7	group IV-1	0.599103	500.457	507.843	1.72
		group III-2	0.825438	706.216							group IV-2	0.607562	508.147
		group III-3	0.815062	696.784							group IV-3	0.615017	514.924
	8	group III-1	1.10408	959.532	958.046	3.25				8	group IV-1	0.615733	515.575	516.591	1.75
		group III-2	1.10805	963.135							group IV-2	0.613747	513.77
		group III-3	1.09522	951.472							group IV-3	0.621071	520.428
	9	group III-1	0.856035	734.032	737.686	2.5				9	group IV-1	0.591065	493.15	495.947	1.68
		group III-2	0.863446	740.769							group IV-2	0.588707	491.006
		group III-3	0.860684	738.258							group IV-3	0.602651	503.683
	Repeat	Sample Name	OD	pg/mL	mean	fold change				Repeat	Sample Name	OD	pg/mL	mean	fold change
	1	group V-1	0.685219	578.745	583.231	1.98				1	group VI-1	0.811402	693.456	701.94	2.38
		group V-2	0.69618	588.709							group VI-2	0.829009	709.463
		group V-3	0.689061	582.238							group VI-3	0.821792	702.902
	2	group V-1	0.553825	459.295	462.737	1.57				2	group VI-1	0.843376	722.524	737.716	2.5
		group V-2	0.554536	459.941							group VI-2	0.873077	749.524
		group V-3	0.564473	468.976							group VI-3	0.863808	741.099
	3	group V-1	0.706453	598.048	583.377	1.98				3	group VI-1	1.00299	867.623	863.282	2.93
		group V-2	0.684997	578.543							group VI-2	0.992633	858.212
		group V-3	0.679495	573.541							group VI-3	0.999013	864.012
	4	group V-1	0.608361	508.874	510.559	1.73				4	group VI-1	0.939656	810.051	807.47	2.74
		group V-2	0.612029	512.208							group VI-2	0.934758	805.598
		group V-3	0.610255	510.595							group VI-3	0.936036	806.76
	5	group V-1	0.494128	405.025	398.925	1.35				5	group VI-1	0.89745	771.682	781.73	2.65
		group V-2	0.485707	397.37							group VI-2	0.910716	783.742
		group V-3	0.482416	394.378							group VI-3	0.917341	789.765
	6	group V-1	0.65011	546.827	539.091	1.83				6	group VI-1	0.884411	759.828	760.845	2.58
		group V-2	0.637653	535.503							group VI-2	0.879417	755.288
		group V-3	0.637038	534.943							group VI-3	0.89276	767.418
	7	group V-1	0.652939	549.399	548.552	1.86				7	group VI-1	0.835965	715.787	713.165	2.42
		group V-2	0.6466	543.636							group VI-2	0.840167	719.607
		group V-3	0.656483	552.621							group VI-3	0.823111	704.101
	8	group V-1	0.621756	521.051	524.597	1.78				8	group VI-1	1.06723	926.027	922.519	3.13
		group V-2	0.631891	530.264							group VI-2	1.06292	922.11
		group V-3	0.623324	522.477							group VI-3	1.05996	919.42
	9	group V-1	0.52876	436.509	439.044	1.49				9	group VI-1	0.933764	804.695	804.771	2.73
		group V-2	0.535658	442.78							group VI-2	0.931097	802.27
		group V-3	0.530228	437.843							group VI-3	0.936683	807.348
6d
I	II	III	IV	V	VI
8.43	61.91	57.1	22.99	29.18	41.36
9.61	48.22	53.02	22.87	24.45	39.58
8.86	55.29	53.36	26.58	23.52	46.32
9.86	64.37	56.9	27.6	26.32	35.55
8.33	57.7	57.1	25.49	28.51	36.21
9.19	48.72	58.58	21.93	26.73	32.21
10	52.98	56.19	25.59	27.89	34.28
9.03	60.52	53.26	24.25	24.39	29.75
10.4	48.76	51.68	23.85	28.24	33.48
6e
I	II	III	IV	V	VI
109.49	52.53	49.57	75.22	70.12	49.74
115.57	61.53	55.87	70.11	80.46	61.28
107.63	46.92	49.82	87.39	81	55.26
112.37	56.93	56.57	76.11	93.62	55.38
95.78	53.72	61.58	71.57	75.91	60.27
100.73	60.33	55.94	64.54	88.71	58.05
105.23	64.33	56.52	73.76	81.93	59.44
95.9	58.31	55.78	74.21	76.48	58.61
104.38	54.57	59.19	78.9	72.27	54.74

## Sheet: figure 7
7a					7b
	p/t-PI3K	p/t-AKT				p/t-MEK1	p/t-ERK1/2
I	0.96	1.01			I	1.19	1.03
	0.96	0.94				1.04	0.96
	1.06	0.98				0.93	0.94
	0.98	1				1.06	1.07
	1.15	1.03				1.01	1.22
	0.97	1.06				0.93	1.02
	1.14	0.96				0.89	0.96
	1.01	1.1				1.01	0.96
	1.12	0.87				1	0.9
II	0.56	0.58			II	0.55	0.31
	0.45	0.53				0.52	0.37
	0.55	0.58				0.55	0.31
	0.53	0.53				0.4	0.32
	0.51	0.53				0.64	0.35
	0.54	0.6				0.49	0.33
	0.49	0.65				0.56	0.34
	0.6	0.57				0.48	0.31
	0.47	0.59				0.56	0.35
III	0.58	0.53			III	0.46	0.29
	0.57	0.55				0.5	0.32
	0.6	0.5				0.5	0.28
	0.53	0.54				0.49	0.27
	0.53	0.46				0.48	0.32
	0.61	0.57				0.47	0.26
	0.53	0.52				0.45	0.3
	0.64	0.54				0.46	0.32
	0.57	0.6				0.5	0.3
IV	0.8	0.88			IV	0.78	0.67
	0.78	0.93				0.86	0.7
	0.83	0.94				0.81	0.63
	0.75	0.93				0.8	0.62
	0.81	0.9				0.93	0.65
	0.88	0.84				0.85	0.65
	0.8	0.79				0.8	0.64
	0.82	0.84				0.83	0.68
	0.96	0.79				0.81	0.66
V	0.87	0.88			V	0.76	0.74
	0.86	0.86				0.81	0.74
	0.86	0.81				0.91	0.72
	0.78	0.8				0.96	0.57
	0.93	0.81				0.91	0.64
	0.86	0.78				0.76	0.6
	0.9	0.89				0.8	0.63
	0.9	0.85				0.81	0.8
	0.86	0.89				0.8	0.61
VI	0.66	0.66			VI	0.51	0.43
	0.68	0.53				0.66	0.44
	0.61	0.62				0.53	0.44
	0.61	0.57				0.51	0.45
	0.65	0.55				0.58	0.43
	0.65	0.68				0.54	0.42
	0.65	0.51				0.49	0.45
	0.7	0.67				0.5	0.43
	0.5	0.6				0.56	0.43
